# Supplementary material
Source: publisher figshare collection journal article supplement (https://karger.figshare.com/ndownloader/files/14065382)
Supplement: Supplementary file 1 [file 14065382]

**Supplement Table 3: Association of SNPs with cardiovascular outcomes**

| **Outcome** | **Gene rsID** | **p value** | **HR (95% CI)** | **EA HR** | **AfAn HR** | **Event Number (EA/AfAn)** | **Censored Patients**  **(EA/AfAn)** | **Competing Events (EA/AfAn)** |
| --- | --- | --- | --- | --- | --- | --- | --- | --- |
| All-Cause Mortality | *FGFR4* rs641101 | 0.962 | 1 (0.87-1.14) | 1.00 | 1.00 | 537 (402/135) | 956 (680/276) | NA |
| All-Cause Mortality | *FGFR4* rs1966265 | 0.911 | 1.01 (0.86-1.18) | 1.02 | 0.92 | 536 (401/135) | 952 (676/276) | NA |
| All-Cause Mortality | *FGFR4* rs376618 | 0.196 | 0.91 (0.79-1.05) | 0.94 | 0.84 | 536 (402/134) | 957 (681/276) | NA |
| All-Cause Mortality | *FGFR4* rs351855 | 0.537 | 1.05 (0.91-1.21) | 1.04 | 1.07 | 535 (401/134) | 955 (679/276) | NA |
| All-Cause Mortality | *FGFR4* rs31777 | 0.620 | 1.15 (0.66-2) | 0.93 | 1.69 | 535 (401/134) | 957 (681/276) | NA |
| All-Cause Mortality | *FGF23* rs11063112 | 0.609 | 1.04 (0.9-1.2) | 1.04 | 1.07 | 536 (401/135) | 954 (678/276) | NA |
| All-Cause Mortality | *FGF23* rs13312789 | 0.601 | 0.94 (0.75-1.18) | 0.92 | 1.05 | 537 (402/135) | 957 (681/276) | NA |
| All-Cause Mortality | *KL* rs577912 | 0.788 | 0.97 (0.78-1.21) | 0.89 | 1.12 | 535 (401/134) | 955 (681/274) | NA |
| All-Cause Mortality | *KL* rs1888057 | 0.121 | 0.88 (0.74-1.04) | 0.86 | 1.00 | 537 (402/135) | 957 (681/276) | NA |
| Cardiovascular Mortality | *FGFR4* rs641101 | 0.549 | 0.95 (0.79-1.13) | 0.94 | 0.97 | 296 (223/73) | 956 (680/276) | 241 (179/62) |
| Cardiovascular Mortality | *FGFR4* rs1966265 | 0.882 | 0.98 (0.8-1.21) | 0.98 | 1.00 | 295 (222/73) | 952 (676/276) | 241 (179/62) |
| Cardiovascular Mortality | *FGFR4* rs376618 | 0.122 | 0.85 (0.7-1.04) | 0.89 | 0.76 | 296 (223/73) | 957 (681/276) | 240 (179/61) |
| Cardiovascular Mortality | *FGFR4* rs351855 | 0.345 | 1.09 (0.91-1.32) | 1.05 | 1.33 | 295 (222/73) | 955 (679/276) | 240 (179/61) |
| Cardiovascular Mortality | *FGFR4* rs31777 | 0.089 | 0.84 (0.68-1.03) | 0.88 | 0.69 | 295 (222/73) | 957 (681/276) | 240 (179/61) |
| Cardiovascular Mortality | *FGF23* rs11063112 | 0.004 | 1.32 (1.09-1.58) | 1.32 | 1.31 | 295 (222/73) | 954 (678/276) | 241 (179/62) |
| Cardiovascular Mortality | *FGF23* rs13312789 | 0.555 | 1.08 (0.83-1.42) | 1.08 | 1.09 | 296 (223/73) | 957 (681/276) | 241 (179/62) |
| Cardiovascular Mortality | *KL* rs577912 | 0.901 | 0.99 (0.79-1.23) | 0.99 | 0.98 | 295 (222/73) | 955 (681/274) | 240 (179/61) |
| Cardiovascular Mortality | *KL* rs1888057 | 0.873 | 0.98 (0.79-1.22) | 0.98 | 1.02 | 296 (223/73) | 957 (681/276) | 241 (179/62) |
| Sudden Cardiac Death | *FGFR4* rs641101 | 0.213 | 0.85 (0.65-1.1) | 0.81 | 0.90 | 125 (89/36) | 955 (680/275) | 413 (313/100) |
| Sudden Cardiac Death | *FGFR4* rs1966265 | 0.583 | 1.1 (0.79-1.52) | 1.03 | 1.64 | 125 (89/36) | 951 (676/275) | 412 (312/100) |
| Sudden Cardiac Death | *FGFR4* rs376618 | 0.279 | 0.84 (0.62-1.15) | 0.79 | 1.01 | 125 (89/36) | 956 (681/275) | 412 (313/99) |
| Sudden Cardiac Death | *FGFR4* rs351855 | 0.294 | 1.17 (0.88-1.55) | 1.17 | 1.15 | 125 (89/36) | 954 (679/275) | 411 (312/99) |
| Sudden Cardiac Death | *FGFR4* rs31777 | 0.266 | 0.85 (0.63-1.14) | 0.77 | 1.04 | 124 (88/36) | 956 (681/275) | 412 (313/99) |
| Sudden Cardiac Death | *FGF23* rs11063112 | 0.295 | 1.16 (0.88-1.54) | 1.10 | 1.68 | 125 (89/36) | 953 (678/275) | 412 (312/100) |
| Sudden Cardiac Death | *FGF23* rs13312789 | 0.853 | 0.92 (0.38-2.21) | 0.62 | 1.53 | 125 (89/36) | 956 (681/275) | 413 (313/100) |
| Sudden Cardiac Death | *KL* rs577912 | 0.325 | 1.17 (0.86-1.59) | 1.07 | 1.36 | 124 (88/36) | 954 (681/273) | 412 (313/99) |
| Sudden Cardiac Death | *KL* rs1888057 | 0.510 | 1.11 (0.81-1.52) | 1.09 | 1.19 | 125 (89/36) | 956 (681/275) | 413 (313/100) |
| Heart Failure | *FGFR4* rs641101 | 0.840 | 0.98 (0.79-1.21) | 0.97 | 1.00 | 184 (100/84) | 861 (641/220) | 448 (341/107) |
| Heart Failure | *FGFR4* rs1966265 | 0.801 | 1.04 (0.78-1.37) | 1.08 | 0.82 | 184 (100/84) | 857 (637/220) | 447 (340/107) |
| Heart Failure | *FGFR4* rs376618 | 0.322 | 1.12 (0.89-1.4) | 1.01 | 1.23 | 184 (100/84) | 862 (642/220) | 447 (341/106) |
| Heart Failure | *FGFR4* rs351855 | 0.742 | 0.93 (0.6-1.43) | 0.76 | 1.19 | 183 (99/84) | 861 (641/220) | 446 (340/106) |
| Heart Failure | *FGFR4* rs31777 | 0.180 | 1.28 (0.89-1.84) | 1.07 | 1.55 | 184 (100/84) | 862 (642/220) | 446 (340/106) |
| Heart Failure | *FGF23* rs11063112 | 0.007 | 1.4 (1.1-1.79) | 1.37 | 1.51 | 184 (100/84) | 859 (639/220) | 447 (340/107) |
| Heart Failure | *FGF23* rs13312789 | 0.023 | 1.51 (1.06-2.16) | 1.30 | 1.87 | 184 (100/84) | 862 (642/220) | 448 (341/107) |
| Heart Failure | *KL* rs577912 | 0.810 | 0.94 (0.58-1.54) | 0.72 | 1.19 | 184 (100/84) | 860 (642/218) | 446 (340/106) |
| Heart Failure | *KL* rs1888057 | 0.984 | 0.99 (0.61-1.62) | 0.79 | 1.31 | 184 (100/84) | 862 (642/220) | 448 (341/107) |

Meta-analysis results for survival analysis with cardiovascular outcome adjusted for age, sex, duration of dialysis, history (current/past) of smoking, and treatment (placebo/cinacalcet). rsID = reference SNP ID number, HR = Hazard Ratio, 95% CI =95% confidence interval, EA = European Ancestry, AfAn= African Ancestry. The HR represents the increased risk for each copy of the reference allele.
